# Supplementary material for: In Vitro Effects of Selective COX and LOX Inhibitors and Their Combinations with Antineoplastic Drugs in the Mouse Melanoma Cell Line B16F10
Source: MDPI journal article supplement (doi:10.3390/ijms22126498), 2021-06-17
Supplement: s1 [file s1]

## Supplementary Materials

# In Vitro Effects of Selective COX and LOX Inhibitors and Their Combinations with Antineoplastic Drugs in the Mouse Melanoma Cell Line B16F10

Ines Da-Costa-Rocha <sup>1</sup> and Jose M. Prieto <sup>1,2,\*</sup><sup>1</sup> The School of Pharmacy, University of London, 29-39 Brunswick Square, London WC1N 1AX, UK; rocha.ines@gmail.com<sup>2</sup> School of Pharmacy and Biomolecular Sciences, Liverpool John Moores University, Liverpool L3 3AF, UK

\* Correspondence: j.m.prietogarcia@ljmu.ac.uk

## 1. Cytotoxicity studies

Table S1. Tabulated data for IC<sub>50</sub> and IC<sub>20</sub> values of single treatments.

|          |                  | DTIC                 |                      | TMZ                  |                      |
|----------|------------------|----------------------|----------------------|----------------------|----------------------|
|          |                  | MTT                  | SRB                  | MTT                  | SRB                  |
| 24 hours | IC <sub>50</sub> | -                    | -                    | -                    | -                    |
| 48 hours | IC <sub>50</sub> | 1.23*10 <sup>3</sup> | 1.27*10 <sup>3</sup> | 1.03*10 <sup>3</sup> | -                    |
| 72 hours | IC <sub>50</sub> | 1.21*10 <sup>3</sup> | 1.33*10 <sup>3</sup> | 1.23*10 <sup>3</sup> | 1.01*10 <sup>3</sup> |

|          |                  | Meloxicam            |                      | ASA                  |                      |
|----------|------------------|----------------------|----------------------|----------------------|----------------------|
|          |                  | MTT                  | SRB                  | MTT                  | SRB                  |
| 24 hours | IC <sub>20</sub> | 0.16*10 <sup>3</sup> | 0.16*10 <sup>3</sup> | 1.00*10 <sup>3</sup> | 1.00*10 <sup>3</sup> |
|          | IC <sub>50</sub> | 0.76*10 <sup>3</sup> | 0.68*10 <sup>3</sup> | 4.78*10 <sup>3</sup> | 8.64*10 <sup>3</sup> |
| 48 hours | IC <sub>20</sub> | 0.16*10 <sup>3</sup> | 0.16*10 <sup>3</sup> | 1.00*10 <sup>3</sup> | 1.00*10 <sup>3</sup> |
|          | IC <sub>50</sub> | 0.59*10 <sup>3</sup> | 0.54*10 <sup>3</sup> | 3.10*10 <sup>3</sup> | 3.80*10 <sup>3</sup> |
| 72 hours | IC <sub>20</sub> | 0.16*10 <sup>3</sup> | 0.16*10 <sup>3</sup> | 1.00*10 <sup>3</sup> | 1.00*10 <sup>3</sup> |
|          | IC <sub>50</sub> | 0.65*10 <sup>3</sup> | 0.61*10 <sup>3</sup> | 3.86*10 <sup>3</sup> | 3.89*10 <sup>3</sup> |

|          |                  | AA-861 |       | MK-886  |         |
|----------|------------------|--------|-------|---------|---------|
|          |                  | MTT    | SRB   | MTT     | SRB     |
| 24 hours | IC <sub>20</sub> | 10.00  | 20.00 | 5-10.00 | 10.00   |
|          | IC <sub>50</sub> | 41.03  | 39.45 | 20.98   | 24.99   |
| 48 hours | IC <sub>20</sub> | 2.50   | 10.00 | <5.00   | 5-10.00 |
|          | IC <sub>50</sub> | 30.50  | 37.33 | 12.41   | 14.34   |
| 72 hours | IC <sub>20</sub> | 2.50   | 10.00 | 5.00    | 5-10.00 |
|          | IC <sub>50</sub> | 12.08  | 37.61 | 13.96   | 12.42   |

|          |                  | Baicalein |       | PD-146176 |       |
|----------|------------------|-----------|-------|-----------|-------|
|          |                  | MTT       | SRB   | MTT       | SRB   |
| 24 hours | IC <sub>20</sub> | 5.00      | 5.00  | 1.00      | 1.00  |
|          | IC <sub>50</sub> | 30.98     | 41.06 | 13.89     | 13.64 |
| 48 hours | IC <sub>20</sub> | 5.00      | 5.00  | 1.00      | 1.00  |
|          | IC <sub>50</sub> | 11.43     | 34.14 | 11.24     | 10.69 |
| 72 hours | IC <sub>20</sub> | 5.00      | 5.00  | 1.00      | 1.00  |
|          | IC <sub>50</sub> | 33.68     | 30.53 | 16.85     | 12.65 |

**Citation:** Da-Costa-Rocha, I.; Prieto, J.M. In Vitro Effects of Selective COX and LOX Inhibitors and Their Combinations with Antineoplastic Drugs in the Mouse Melanoma Cell Line B16F10. *Int. J. Mol. Sci.* **2021**, *22*, 6498. <https://doi.org/10.3390/ijms22126498>

Academic Editor: Jochen Utikal

Received: 25 April 2021

Accepted: 31 May 2021

Published: 17 June 2021

**Publisher's Note:** MDPI stays neutral with regard to jurisdictional claims in published maps and institutional affiliations.

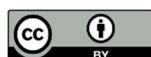

**Copyright:** © 2021 by the authors. Licensee MDPI, Basel, Switzerland. This article is an open access article distributed under the terms and conditions of the Creative Commons Attribution (CC BY) license (<http://creativecommons.org/licenses/by/4.0/>).

## 2. Cell cycle profiles for single drug treatments

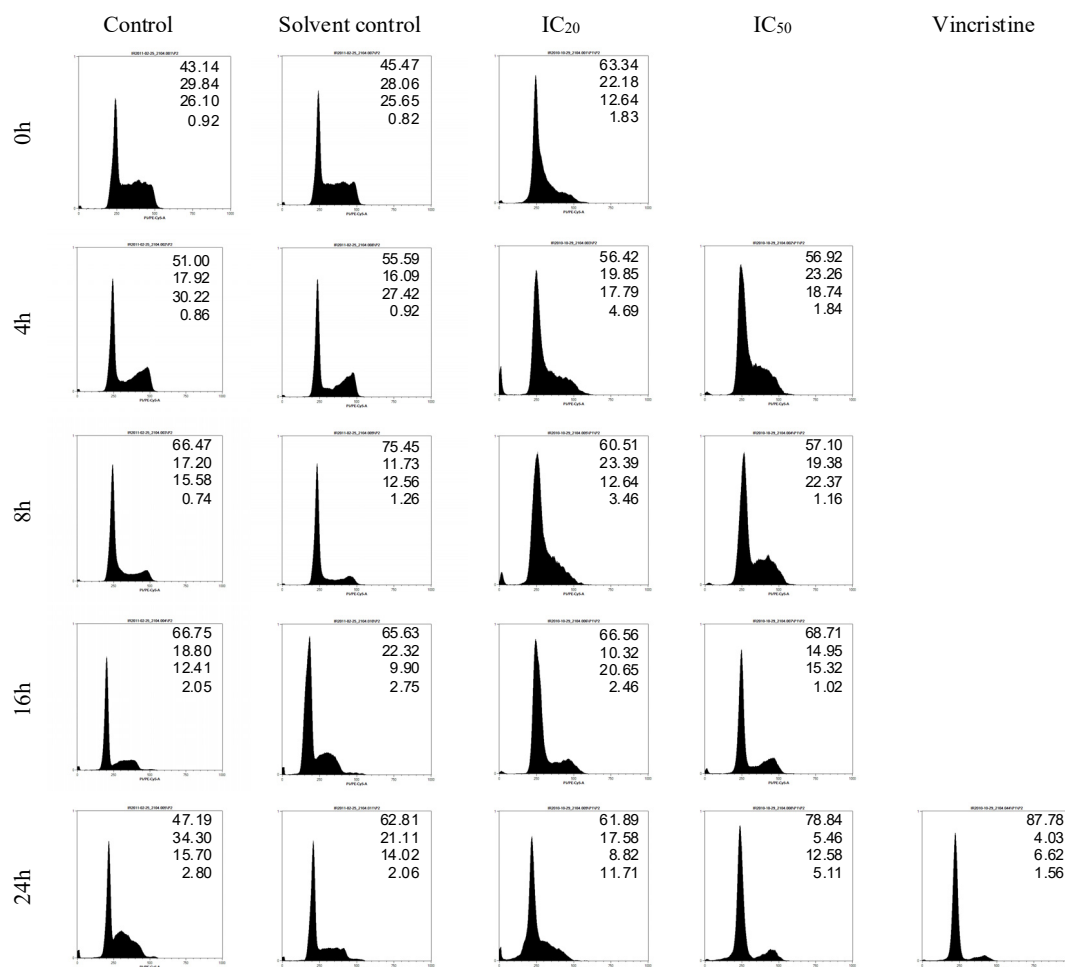

**Figure S1.** Effects of COX2 inhibitor on cell cycle status. B16F10 cells were treated with IC<sub>20</sub> and IC<sub>50</sub> concentration of Meloxicam inhibitor for 0, 4, 8, 16 and 24 hours. Flow cytometric analysis of DNA content was performed after propidium iodide staining. Percentage of cells in each phase of the cell cycle (sub-G<sub>1</sub>, G<sub>1</sub>, S, and G<sub>2</sub>/M) is indicated. Representative data from three independent experiments are shown.

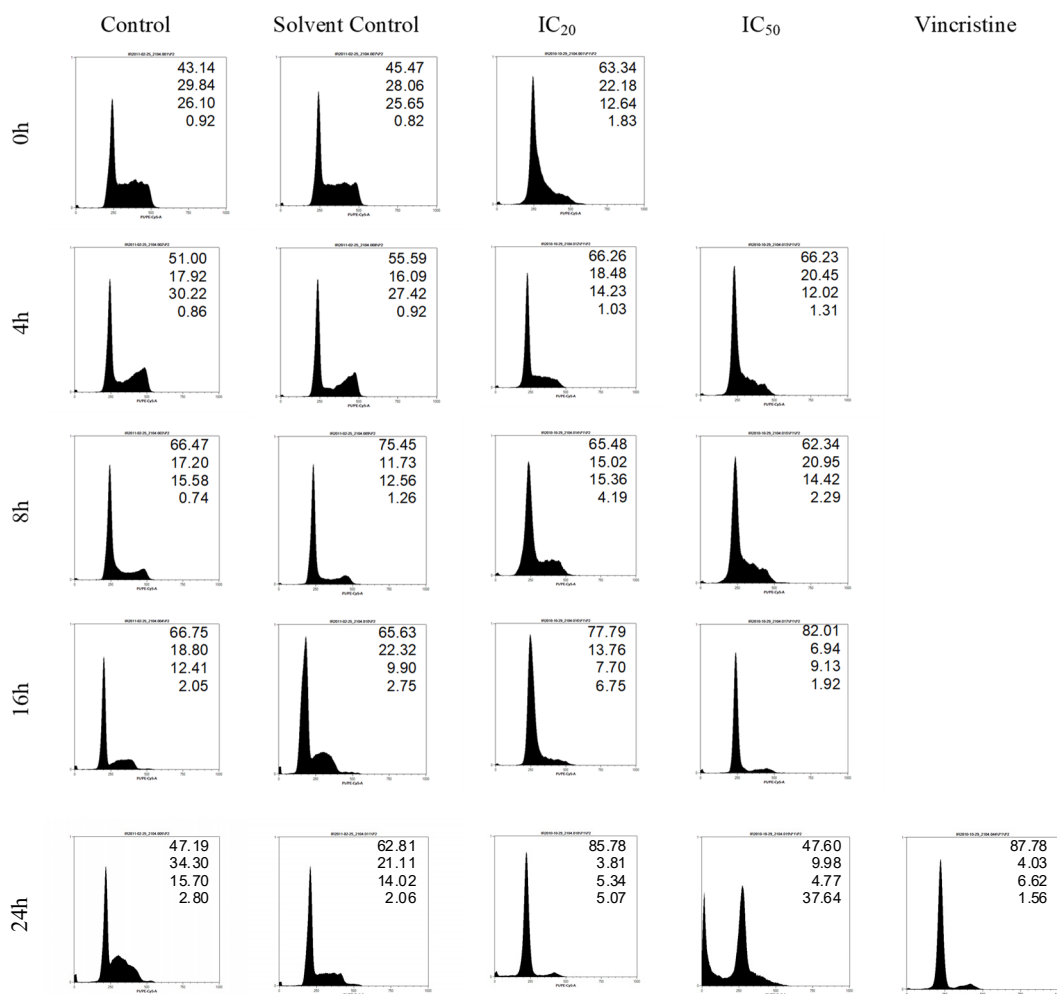

**Figure S2. Effects of COX1 inhibitor on cell cycle status.** B16F10 cells were treated with IC<sub>20</sub> and IC<sub>50</sub> concentration of Acetyl salicylic acid (ASA) inhibitor for 0, 4, 8, 16 and 24 hours. Flow cytometric analysis of DNA content was performed after propidium iodide staining. Percentage of cells in each phase of the cell cycle (sub-G<sub>1</sub>, G<sub>1</sub>, S, and G<sub>2</sub>/M) is indicated. Representative data from three independent experiments are shown.

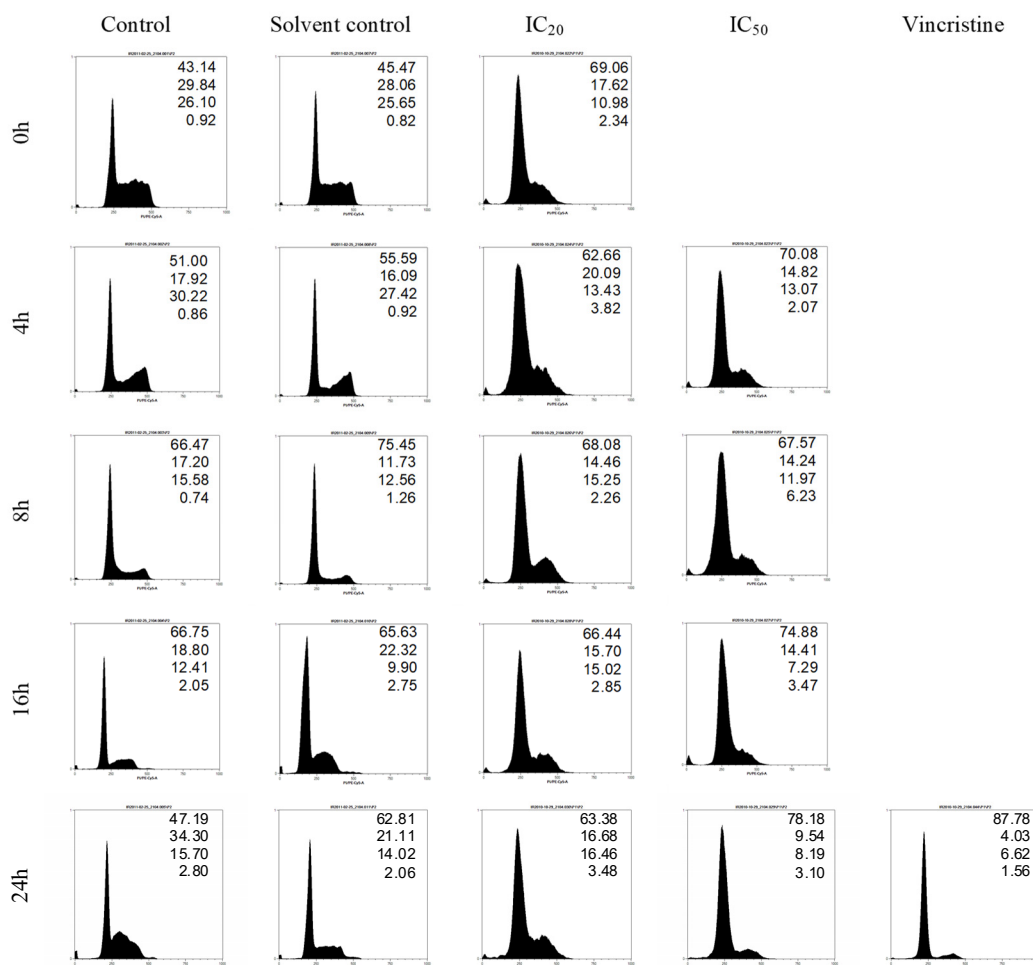

**Figure S3.** Effects of the 5-LOX inhibitor AA-861 on cell cycle status. B16F10 cells were treated with IC<sub>20</sub> and IC<sub>50</sub> concentration of AA-861 for 0, 4, 8, 16 and 24 hours. Flow cytometric analysis of DNA content was performed after propidium iodide staining. Percentage of cells in each phase of the cell cycle (sub-G<sub>1</sub>, G<sub>1</sub>, S, and G<sub>2</sub>/M) is indicated. Representative data from three independent experiments are shown.

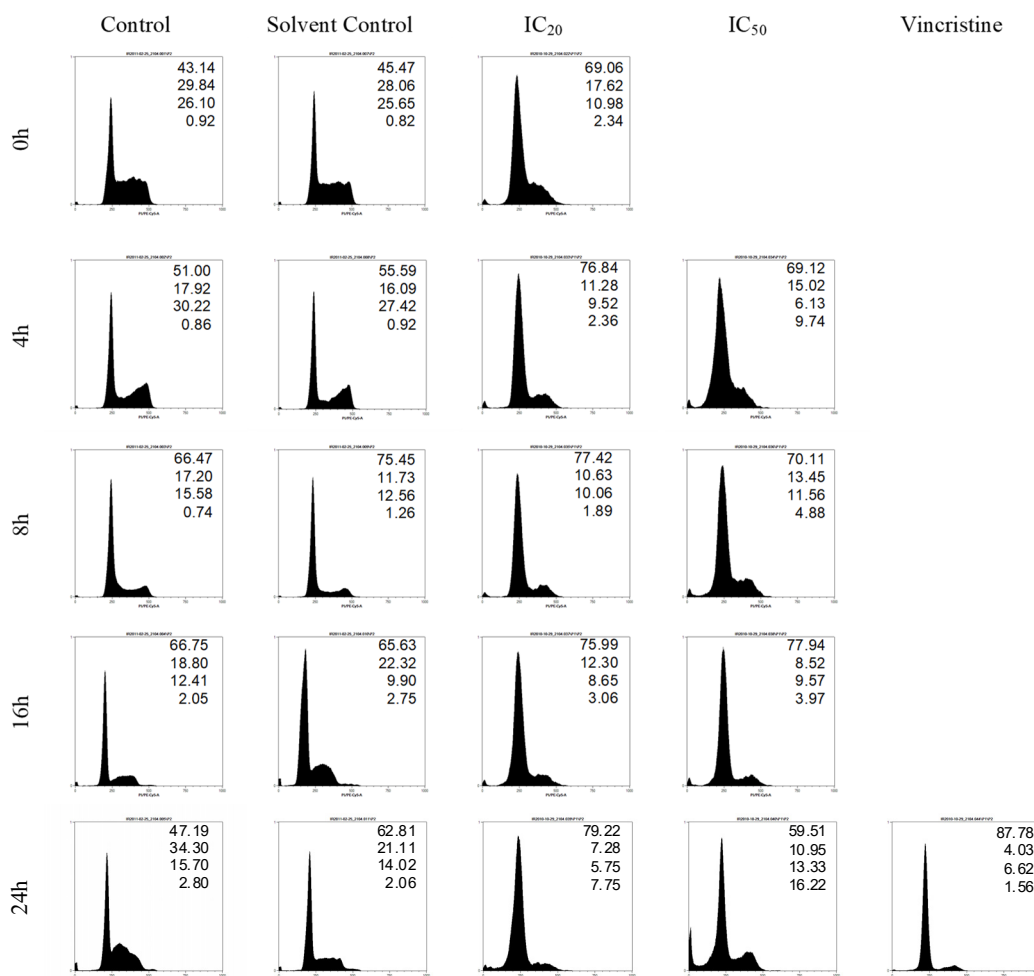

**Figure S4.** Effects of the FLAP inhibitor MK-886 on cell cycle status. B16F10 cells were treated with IC<sub>20</sub> and  $\mu$ M IC<sub>50</sub> concentration of MK-886 for 0, 4, 8, 16 and 24 hours. Flow cytometric analysis of DNA content was performed after propidium iodide staining. Percentage of cells in each phase of the cell cycle (sub-G<sub>1</sub>, G<sub>1</sub>, S, and G<sub>2</sub>/M) is indicated. Representative data from three independent experiments are shown.

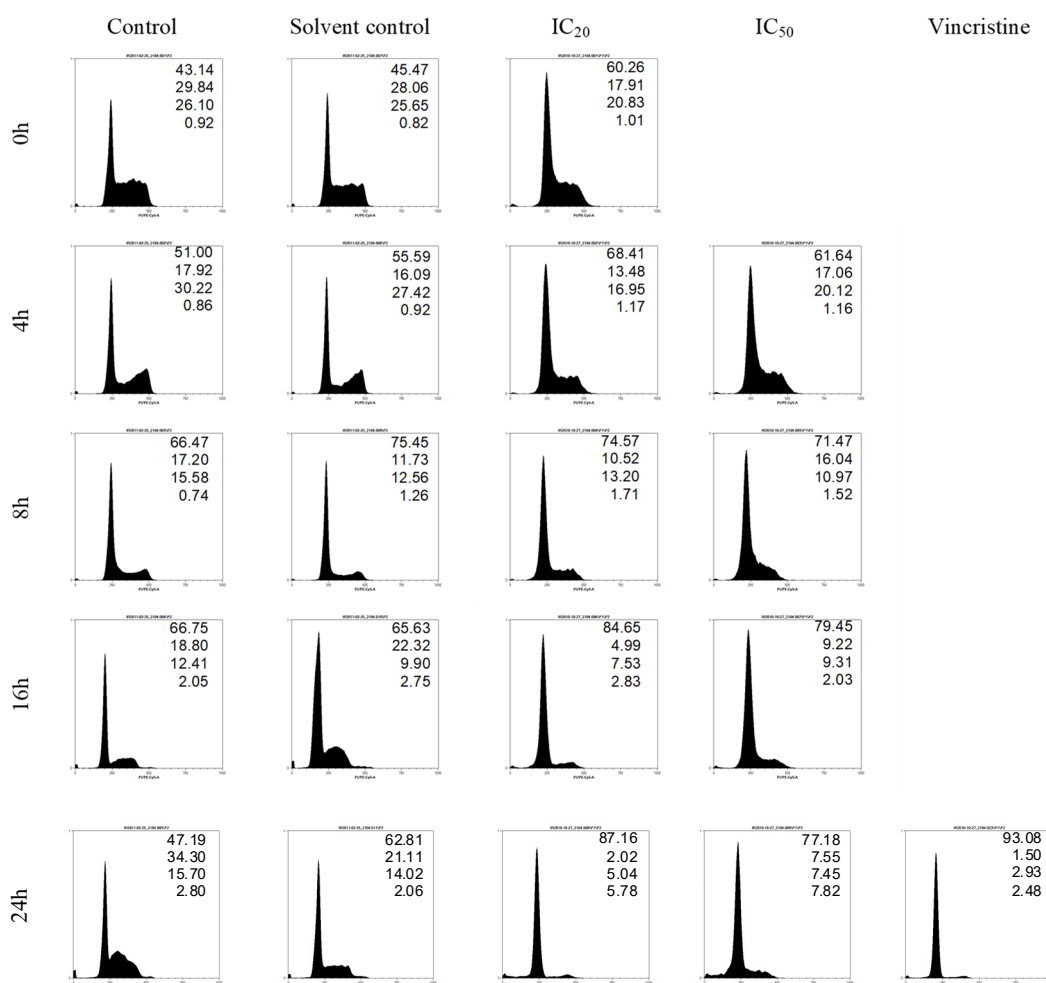

**Figure S5. Effects of the 12-LOX inhibitor baicalein on cell cycle status.** B16F10 cells were treated with IC<sub>20</sub> and IC<sub>50</sub> concentration of Baicalein for 0, 4, 8, 16 and 24 hours. Flow cytometric analysis of DNA content was performed after propidium iodide staining. Percentage of cells in each phase of the cell cycle (sub-G<sub>1</sub>, G<sub>1</sub>, S, and G<sub>2</sub>/M) is indicated. Representative data from three independent experiments are shown.

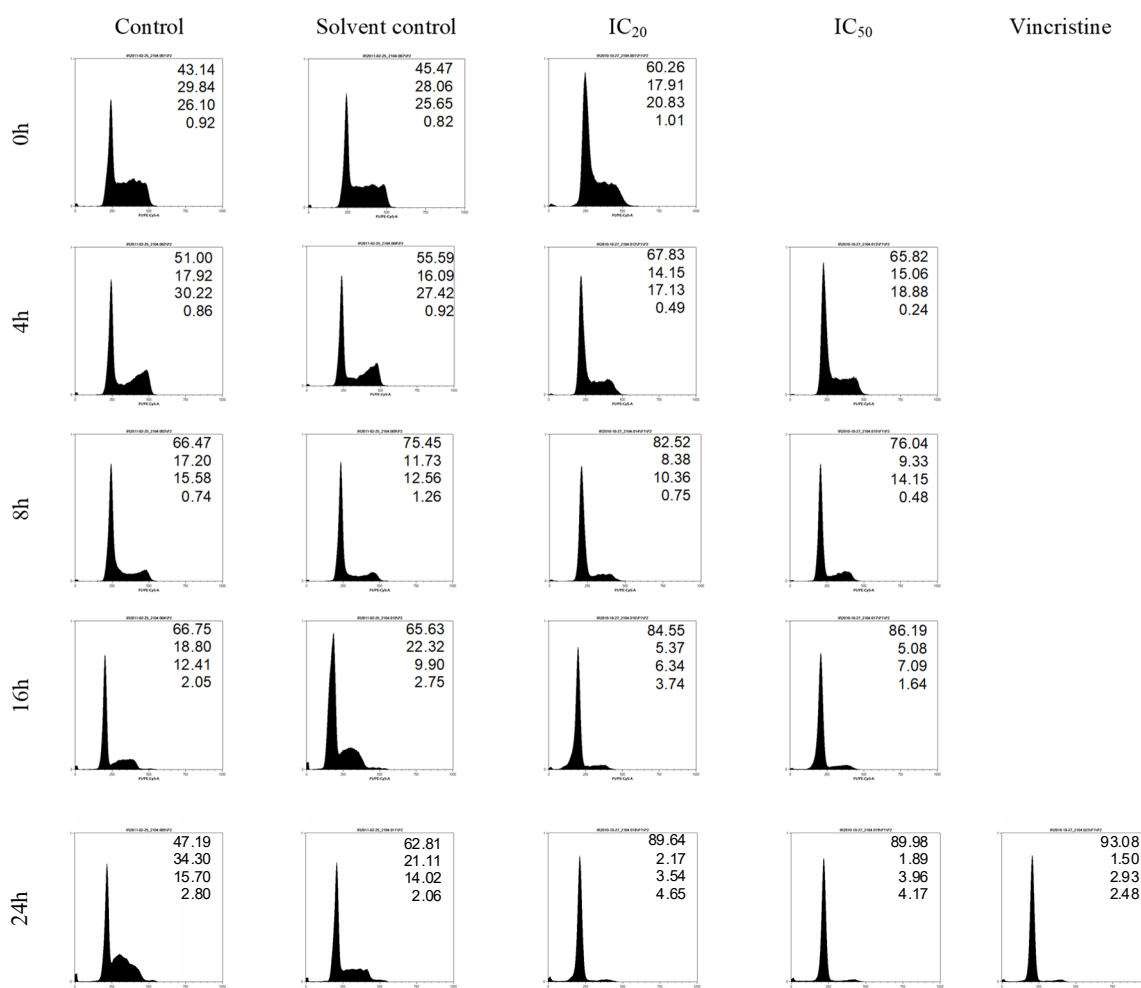

**Figure S6.** Effects of the 15-LOX inhibitor PD-146176 on cell cycle status. B16F10 cells were treated with IC<sub>20</sub> and IC<sub>50</sub> concentration of PD-146176 for 0, 4, 8, 16 and 24 hours. Flow cytometric analysis of DNA content was performed after propidium iodide staining. Percentage of cells in each phase of the cell cycle (sub-G<sub>1</sub>, G<sub>1</sub>, S, and G<sub>2</sub>/M) is indicated. Representative data from three independent experiments are shown.

### 3. Numerical results from the combination values

**Table S2.** Combination index (CI) and fraction affected ( $f_a$ ) values in B16F10 cells for DTIC or TMZ and meloxicam in combination based on the Calcsyn software.

| DTIC<br>( $\mu\text{M}$ ) | Meloxicam<br>( $\mu\text{M}$ ) | $f_a$ | CI    | Effect                | TMZ<br>( $\mu\text{M}$ ) | Meloxicam<br>( $\mu\text{M}$ ) | $f_a$ | CI    | Effect              |
|---------------------------|--------------------------------|-------|-------|-----------------------|--------------------------|--------------------------------|-------|-------|---------------------|
| 100                       | 0.31                           | 0.643 | 0.011 | Very strong synergism | 100                      | 0.31                           | 0.136 | 0.255 | Strong synergism    |
| 100                       | 0.63                           | 0.628 | 0.012 | Very strong synergism | 100                      | 0.63                           | 0.125 | 0.276 | Strong synergism    |
| 100                       | 3.13                           | 0.644 | 0.012 | Very strong synergism | 100                      | 3.13                           | 0.159 | 0.295 | Strong synergism    |
| 100                       | 6.25                           | 0.634 | 0.013 | Very strong synergism | 100                      | 6.25                           | 0.181 | 0.321 | Synergism           |
| 100                       | 31.25                          | 0.637 | 0.020 | Very strong synergism | 100                      | 31.25                          | 0.260 | 0.461 | Synergism           |
| 100                       | 62.50                          | 0.658 | 0.025 | Very strong synergism | 100                      | 62.50                          | 0.332 | 0.506 | Synergism           |
| 100                       | 312.50                         | 0.832 | 0.018 | Very strong synergism | 100                      | 312.50                         | 0.317 | 2.097 | Antagonism          |
| 250                       | 0.31                           | 0.362 | 0.064 | Strong synergism      | 250                      | 0.31                           | 0.275 | 0.431 | Synergism           |
| 250                       | 0.63                           | 0.358 | 0.065 | Strong synergism      | 250                      | 0.63                           | 0.309 | 0.404 | Synergism           |
| 250                       | 3.13                           | 0.361 | 0.070 | Strong synergism      | 250                      | 3.13                           | 0.389 | 0.358 | Synergism           |
| 250                       | 6.25                           | 0.379 | 0.072 | Strong synergism      | 250                      | 6.25                           | 0.398 | 0.364 | Synergism           |
| 250                       | 31.25                          | 0.489 | 0.097 | Strong synergism      | 250                      | 31.25                          | 0.423 | 0.430 | Synergism           |
| 250                       | 62.50                          | 0.409 | 0.104 | Strong synergism      | 250                      | 62.50                          | 0.464 | 0.470 | Synergism           |
| 250                       | 312.50                         | 0.685 | 0.083 | Strong synergism      | 250                      | 312.50                         | 0.486 | 1.027 | Moderate antagonism |
| 500                       | 0.31                           | 0.136 | 0.330 | Synergism             | 500                      | 0.31                           | 0.668 | 0.430 | Synergism           |
| 500                       | 0.63                           | 0.129 | 0.354 | Synergism             | 500                      | 0.63                           | 0.687 | 0.415 | Synergism           |
| 500                       | 3.13                           | 0.155 | 0.345 | Synergism             | 500                      | 3.13                           | 0.646 | 0.451 | Synergism           |
| 500                       | 6.25                           | 0.168 | 0.364 | Synergism             | 500                      | 6.25                           | 0.636 | 0.462 | Synergism           |
| 500                       | 31.25                          | 0.161 | 0.802 | Moderate synergism    | 500                      | 31.25                          | 0.603 | 0.521 | Synergism           |
| 500                       | 62.50                          | 0.212 | 0.779 | Moderate synergism    | 500                      | 62.50                          | 0.598 | 0.566 | Synergism           |
| 500                       | 312.50                         | 0.485 | 0.365 | Synergism             | 500                      | 312.50                         | 0.597 | 0.885 | Slight synergism    |



**Table S3. Combination index (CI), fraction affected (f<sub>a</sub>) values and effect of combination therapy with ASA and DTIC or TMZ.**

| DTIC<br>( $\mu$ M) | ASA ( $\mu$ M) | f <sub>a</sub> | CI    | Effect              | TMZ<br>( $\mu$ M) | ASA ( $\mu$ M) | f <sub>a</sub> | CI    | Effect              |
|--------------------|----------------|----------------|-------|---------------------|-------------------|----------------|----------------|-------|---------------------|
| 100                | 5              | -              | -     | No effect           | 100               | 5              | 0.061          | 0.453 | Synergism           |
| 100                | 10             | -              | -     | No effect           | 100               | 10             | 0.051          | 0.706 | Moderate synergism  |
| 100                | 50             | -              | -     | No effect           | 100               | 50             | 0.070          | 0.993 | Nearly additive     |
| 100                | 100            | -              | -     | No effect           | 100               | 100            | 0.092          | 0.896 | Slightly synergism  |
| 100                | 500            | -              | -     | No effect           | 100               | 500            | 0.190          | 0.534 | Synergism           |
| 100                | 1000           | -              | -     | No effect           | 100               | 1000           | 0.313          | 0.271 | Strong synergism    |
| 100                | 5000           | 0.380          | 0.996 | Nearly additive     | 100               | 5000           | 0.289          | 0.924 | Nearly additive     |
| 250                | 5              | -              | -     | No effect           | 250               | 5              | 0.081          | 0.826 | Slightly synergism  |
| 250                | 10             | -              | -     | No effect           | 250               | 10             | 0.056          | 1.170 | Moderate antagonism |
| 250                | 50             | -              | -     | No effect           | 250               | 50             | 0.121          | 0.785 | Moderate synergism  |
| 250                | 100            | -              | -     | No effect           | 250               | 100            | 0.132          | 0.830 | Moderate synergism  |
| 250                | 500            | 0.012          | 1.266 | Moderate antagonism | 250               | 500            | 0.312          | 0.455 | Synergism           |
| 250                | 1000           | 0.079          | 0.538 | Synergism           | 250               | 1000           | 0.441          | 0.343 | Synergism           |
| 250                | 5000           | 0.475          | 0.945 | Nearly additive     | 250               | 5000           | 0.356          | 0.702 | Moderate synergism  |
| 500                | 5              | -              | -     | No effect           | 500               | 5              | 0.203          | 1.013 | Nearly additive     |
| 500                | 10             | -              | -     | No effect           | 500               | 10             | 0.191          | 1.049 | Nearly additive     |
| 500                | 50             | -              | -     | No effect           | 500               | 50             | 0.234          | 0.953 | Nearly additive     |
| 500                | 100            | -              | -     | No effect           | 500               | 100            | 0.254          | 0.920 | Nearly additive     |
| 500                | 500            | 0.148          | 0.425 | Synergism           | 500               | 500            | 0.406          | 0.691 | Synergism           |
| 500                | 1000           | 0.249          | 0.406 | Synergism           | 500               | 1000           | 0.482          | 0.608 | Synergism           |
| 500                | 5000           | 0.528          | 0.940 | Nearly additive     | 500               | 5000           | 0.479          | 0.682 | Synergism           |

**Table S4.** Combination index (CI) and fraction affected ( $f_a$ ) values in B16F10 cells for DTIC or TMZ and AA-861 in combination based on the Calcsyn software.

| DTIC<br>( $\mu$ M) | AA-861<br>( $\mu$ M) | $f_a$ | CI      | Effect                 | TMZ<br>( $\mu$ M) | AA-861<br>( $\mu$ M) | $f_a$ | CI    | Effect              |
|--------------------|----------------------|-------|---------|------------------------|-------------------|----------------------|-------|-------|---------------------|
| 100                | 0.02                 | -     | -       | No effect              | 100               | 0.02                 | -     | -     | No effect           |
| 100                | 0.04                 | 0.018 | 1.909   | Antagonism             | 100               | 0.04                 | -     | -     | No effect           |
| 100                | 0.20                 | 0.059 | 0.817   | Moderate synergism     | 100               | 0.20                 | -     | -     | No effect           |
| 100                | 0.40                 | 0.016 | 20.608  | Very strong antagonism | 100               | 0.40                 | 0.028 | 4.529 | Strong antagonism   |
| 100                | 2.00                 | 0.021 | 58.668  | Very strong antagonism | 100               | 2.00                 | 0.104 | 2.485 | Antagonism          |
| 100                | 4.00                 | 0.105 | 4.051   | Strong antagonism      | 100               | 4.00                 | 0.178 | 1.855 | Antagonism          |
| 100                | 20.00                | 0.363 | 0.880   | Moderate synergism     | 100               | 20.00                | 0.343 | 2.176 | Antagonism          |
| 250                | 0.02                 | -     | -       | No effect              | 250               | 0.02                 | -     | -     | No effect           |
| 250                | 0.04                 | -     | -       | No effect              | 250               | 0.04                 | -     | -     | No effect           |
| 250                | 0.20                 | 0.003 | 293.922 | Very strong antagonism | 250               | 0.20                 | -     | -     | No effect           |
| 250                | 0.40                 | 0.008 | 83.245  | Very strong antagonism | 250               | 0.40                 | -     | -     | No effect           |
| 250                | 2.00                 | 0.029 | 30.765  | Very strong antagonism | 250               | 2.00                 | 0.054 | 7.744 | Strong antagonism   |
| 250                | 4.00                 | 0.102 | 4.439   | Strong synergism       | 250               | 4.00                 | 0.139 | 3.222 | Antagonism          |
| 250                | 20.00                | 0.364 | 0.910   | Nearly additive        | 250               | 20.00                | 0.302 | 3.136 | Antagonism          |
| 500                | 0.02                 | 0.119 | 0.376   | Synergism              | 500               | 0.02                 | 0.557 | 0.523 | Synergism           |
| 500                | 0.04                 | 0.159 | 0.297   | Synergism              | 500               | 0.04                 | 0.628 | 0.463 | Synergism           |
| 500                | 0.20                 | 0.162 | 0.351   | Synergism              | 500               | 0.20                 | 0.335 | 0.783 | Moderate synergism  |
| 500                | 0.40                 | 0.638 | 0.057   | Very strong synergism  | 500               | 0.40                 | 0.539 | 0.549 | Synergism           |
| 500                | 2.00                 | 0.638 | 0.064   | Very strong synergism  | 500               | 2.00                 | 0.501 | 0.645 | Synergism           |
| 500                | 4.00                 | 0.649 | 0.069   | Very strong synergism  | 500               | 4.00                 | 0.426 | 0.881 | Slight synergism    |
| 500                | 20.00                | 0.662 | 0.124   | Strong synergism       | 500               | 20.00                | 0.515 | 1.216 | Moderate antagonism |

**Table S5. Combination index (CI) and fraction affected ( $f_a$ ) values in B16F10 cells for DTIC or TMZ and MK-886 in combination based on the Calcsyn software.**

| DTIC<br>( $\mu$ M) | MK-886<br>( $\mu$ M) | $f_a$ | CI     | Effect                 | DTIC<br>( $\mu$ M) | MK-886<br>( $\mu$ M) | $f_a$ | CI     | Effect                 |
|--------------------|----------------------|-------|--------|------------------------|--------------------|----------------------|-------|--------|------------------------|
| 100                | 0.015                | -     | -      | No effect              | 100                | 0.015                | -     | -      | No effect              |
| 100                | 0.030                | -     | -      | No effect              | 100                | 0.030                | -     | -      | No effect              |
| 100                | 0.150                | 0.029 | 3.271  | Strong antagonism      | 100                | 0.150                | -     | -      | No effect              |
| 100                | 0.300                | 0.045 | 2.879  | Antagonism             | 100                | 0.300                | 0.009 | 48.036 | Very strong antagonism |
| 100                | 1.500                | 0.067 | 6.569  | Strong antagonism      | 100                | 1.500                | 0.046 | 10.351 | Very strong antagonism |
| 100                | 3.0000               | 0.133 | 3.432  | Strong antagonism      | 100                | 3.0000               | 0.174 | 1.432  | Antagonism             |
| 100                | 15.000               | 0.505 | 0.604  | Synergism              | 100                | 15.000               | 0.340 | 1.263  | Moderate antagonism    |
| 250                | 0.015                | -     | -      | No effect              | 250                | 0.015                | -     | -      | No effect              |
| 250                | 0.030                | -     | -      | No effect              | 250                | 0.030                | -     | -      | No effect              |
| 250                | 0.150                | 0.036 | 2.518  | Antagonism             | 250                | 0.150                | -     | -      | No effect              |
| 250                | 0.300                | 0.034 | 5.048  | Very strong antagonist | 250                | 0.300                | 0.020 | 11.600 | Very strong antagonist |
| 250                | 1.500                | 0.050 | 11.551 | Very strong antagonist | 250                | 1.500                | 0.065 | 5.834  | Strong antagonist      |
| 250                | 3.0000               | 0.068 | 12.835 | Very strong antagonist | 250                | 3.0000               | 0.163 | 1.973  | Antagonist             |
| 250                | 15.000               | 0.409 | 1.222  | Moderate antagonism    | 250                | 15.000               | 0.327 | 1.630  | Antagonist             |
| 500                | 0.015                | -     | -      | No effect              | 500                | 0.015                | -     | -      | No effect              |
| 500                | 0.030                | -     | -      | No effect              | 500                | 0.030                | -     | -      | No effect              |
| 500                | 0.150                | 0.034 | 3.249  | Antagonism             | 500                | 0.150                | -     | -      | No effect              |
| 500                | 0.300                | 0.043 | 3.770  | Strong antagonism      | 500                | 0.300                | 0.073 | 2.425  | Antagonism             |
| 500                | 1.500                | 0.091 | 4.033  | Strong antagonism      | 500                | 1.500                | 0.077 | 5.119  | Strong antagonism      |
| 500                | 3.0000               | 0.074 | 11.213 | Very strong antagonism | 500                | 3.0000               | 0.161 | 2.584  | Antagonism             |
| 500                | 15.000               | 0.289 | 3.157  | Antagonism             | 500                | 15.000               | 0.292 | 2.524  | Antagonism             |

**Table S6. Combination index (CI) and fraction affected ( $f_a$ ) values in B16F10 cells for DTIC or TMZ and Baicalein in combination based on the CalcuSyn software.**

| DTIC<br>( $\mu\text{M}$ ) | Baicalein ( $\mu\text{M}$ ) | $f_a$ | CI    | Effect              | TMZ<br>( $\mu\text{M}$ ) | Baicalein<br>( $\mu\text{M}$ ) | $f_a$ | CI      | Effect                 |
|---------------------------|-----------------------------|-------|-------|---------------------|--------------------------|--------------------------------|-------|---------|------------------------|
| 100                       | 0.025                       | -     | -     | No effect           | 100                      | 0.025                          | -     | -       | No effect              |
| 100                       | 0.050                       | -     | -     | No effect           | 100                      | 0.050                          | -     | -       | No effect              |
| 100                       | 0.250                       | -     | -     | No effect           | 100                      | 0.250                          | -     | -       | No effect              |
| 100                       | 0.500                       | -     | -     | No effect           | 100                      | 0.500                          | 0.01  | 18.264  | Very strong antagonism |
| 100                       | 2.500                       | -     | -     | No effect           | 100                      | 2.500                          | 0.034 | 9.992   | Strong antagonism      |
| 100                       | 5.000                       | 0.017 | 5.136 | Strong antagonism   | 100                      | 5.00                           | 0.079 | 4.238   | Strong antagonism      |
| 100                       | 25.000                      | 0.301 | 1.917 | Antagonism          | 100                      | 25.00                          | 0.299 | 1.300   | Moderate antagonism    |
| 250                       | 0.025                       | -     | -     | No effect           | 250                      | 0.025                          | -     | -       | No effect              |
| 250                       | 0.050                       | -     | -     | No effect           | 250                      | 0.050                          | -     | -       | No effect              |
| 250                       | 0.250                       | -     | -     | No effect           | 250                      | 0.250                          | -     | -       | No effect              |
| 250                       | 0.500                       | -     | -     | No effect           | 250                      | 0.500                          | 0.003 | 153.422 | Very strong antagonism |
| 250                       | 2.500                       | -     | -     | No effect           | 250                      | 2.500                          | 0.031 | 12.486  | Very strong antagonism |
| 250                       | 5.000                       | 0.074 | 1.697 | Antagonism          | 250                      | 5.000                          | 0.098 | 3.295   | Antagonism             |
| 250                       | 25.000                      | 0.359 | 1.596 | Antagonism          | 250                      | 25.000                         | 0.362 | 1.047   | Slight antagonism      |
| 500                       | 0.025                       | 0.099 | 0.425 | Synergism           | 500                      | 0.025                          | -     | -       | No effect              |
| 500                       | 0.050                       | 0.113 | 0.386 | Synergism           | 500                      | 0.050                          | -     | -       | No effect              |
| 500                       | 0.250                       | 0.104 | 0.456 | Synergism           | 500                      | 0.250                          | -     | -       | No effect              |
| 500                       | 0.500                       | 0.115 | 0.469 | Synergism           | 500                      | 0.500                          | 0.036 | 3.950   | Strong antagonism      |
| 500                       | 2.500                       | 0.088 | 1.078 | Nearly additive     | 500                      | 2.500                          | 0.131 | 1.975   | Antagonism             |
| 500                       | 5.000                       | 0.126 | 1.241 | Moderate antagonism | 500                      | 5.000                          | 0.238 | 1.324   | Moderate antagonism    |
| 500                       | 25.000                      | 0.596 | 0.774 | Nearly additive     | 500                      | 25.000                         | 0.384 | 1.277   | Moderate antagonism    |

**Table S7. Combination index (CI) and fraction affected (f<sub>a</sub>) values in B16F10 cells for DTIC or TMZ and PD-146176 in combination based on the Calcsyn software.**

| DTIC (μM) | PD-146176 (μM) | f <sub>a</sub> | CI    | Effect              | TMZ (μM) | PD-146176 (μM) | f <sub>a</sub> | CI    | Effect              |
|-----------|----------------|----------------|-------|---------------------|----------|----------------|----------------|-------|---------------------|
| 100       | 0.005          | -              | -     | No effect           | 100      | 0.005          | -              | -     | No effect           |
| 100       | 0.010          | -              | -     | No effect           | 100      | 0.010          | -              | -     | No effect           |
| 100       | 0.050          | -              | -     | No effect           | 100      | 0.050          | -              | -     | No effect           |
| 100       | 0.100          | -              | -     | No effect           | 100      | 0.100          | -              | -     | No effect           |
| 100       | 0.500          | -              | -     | No effect           | 100      | 0.500          | 0.045          | 2.318 | Antagonism          |
| 100       | 1.000          | 0.027          | 1.255 | Moderate antagonism | 100      | 1.000          | 0.149          | 1.246 | Moderate antagonism |
| 100       | 5.000          | 0.206          | 1.590 | Moderate antagonism | 100      | 5.000          | 0.358          | 1.707 | Antagonism          |
| 250       | 0.005          | -              | -     | No effect           | 250      | 0.005          | -              | -     | No effect           |
| 250       | 0.010          | -              | -     | No effect           | 250      | 0.010          | -              | -     | No effect           |
| 250       | 0.050          | -              | -     | No effect           | 250      | 0.050          | -              | -     | No effect           |
| 250       | 0.100          | -              | -     | No effect           | 250      | 0.100          | -              | -     | No effect           |
| 250       | 0.500          | -              | -     | No effect           | 250      | 0.500          | 0.084          | 1.744 | Antagonism          |
| 250       | 1.000          | 0.041          | 1.232 | Moderate antagonism | 250      | 1.000          | 0.132          | 1.791 | Antagonism          |
| 250       | 5.000          | 0.168          | 1.902 | Antagonism          | 250      | 5.000          | 0.339          | 2.077 | Antagonism          |
| 500       | 0.005          | -              | -     | No effect           | 500      | 0.005          | -              | -     | No effect           |
| 500       | 0.010          | -              | -     | No effect           | 500      | 0.010          | -              | -     | No effect           |
| 500       | 0.050          | -              | -     | No effect           | 500      | 0.050          | -              | -     | No effect           |
| 500       | 0.100          | -              | -     | No effect           | 500      | 0.100          | -              | -     | No effect           |
| 500       | 0.500          | -              | -     | No effect           | 500      | 0.500          | 0.082          | 2.557 | Antagonism          |
| 500       | 1.000          | 0.031          | 1.987 | Antagonism          | 500      | 1.000          | 0.097          | 3.101 | Antagonism          |
| 500       | 5.000          | 0.192          | 1.858 | Antagonism          | 500      | 5.000          | 0.322          | 2.618 | Antagonisms         |
